# Supplementary material for: Molecular features similarities between SARS-CoV-2, SARS, MERS and key human genes could favour the viral infections and trigger collateral effects
Source: PubMed Central journal article supplement (PMC7893037; doi:10.1038/s41598-021-83595-1), 2021-02-18

# Molecular Features Similarities Between SARS-CoV-2, SARS, MERS and Key Human Genes Could Favour The Viral Infections and Trigger Collateral Effects

Authors: Lucas L. Maldonado\*; Andrea Mendoza Bertelli and Laura Kamenetzky

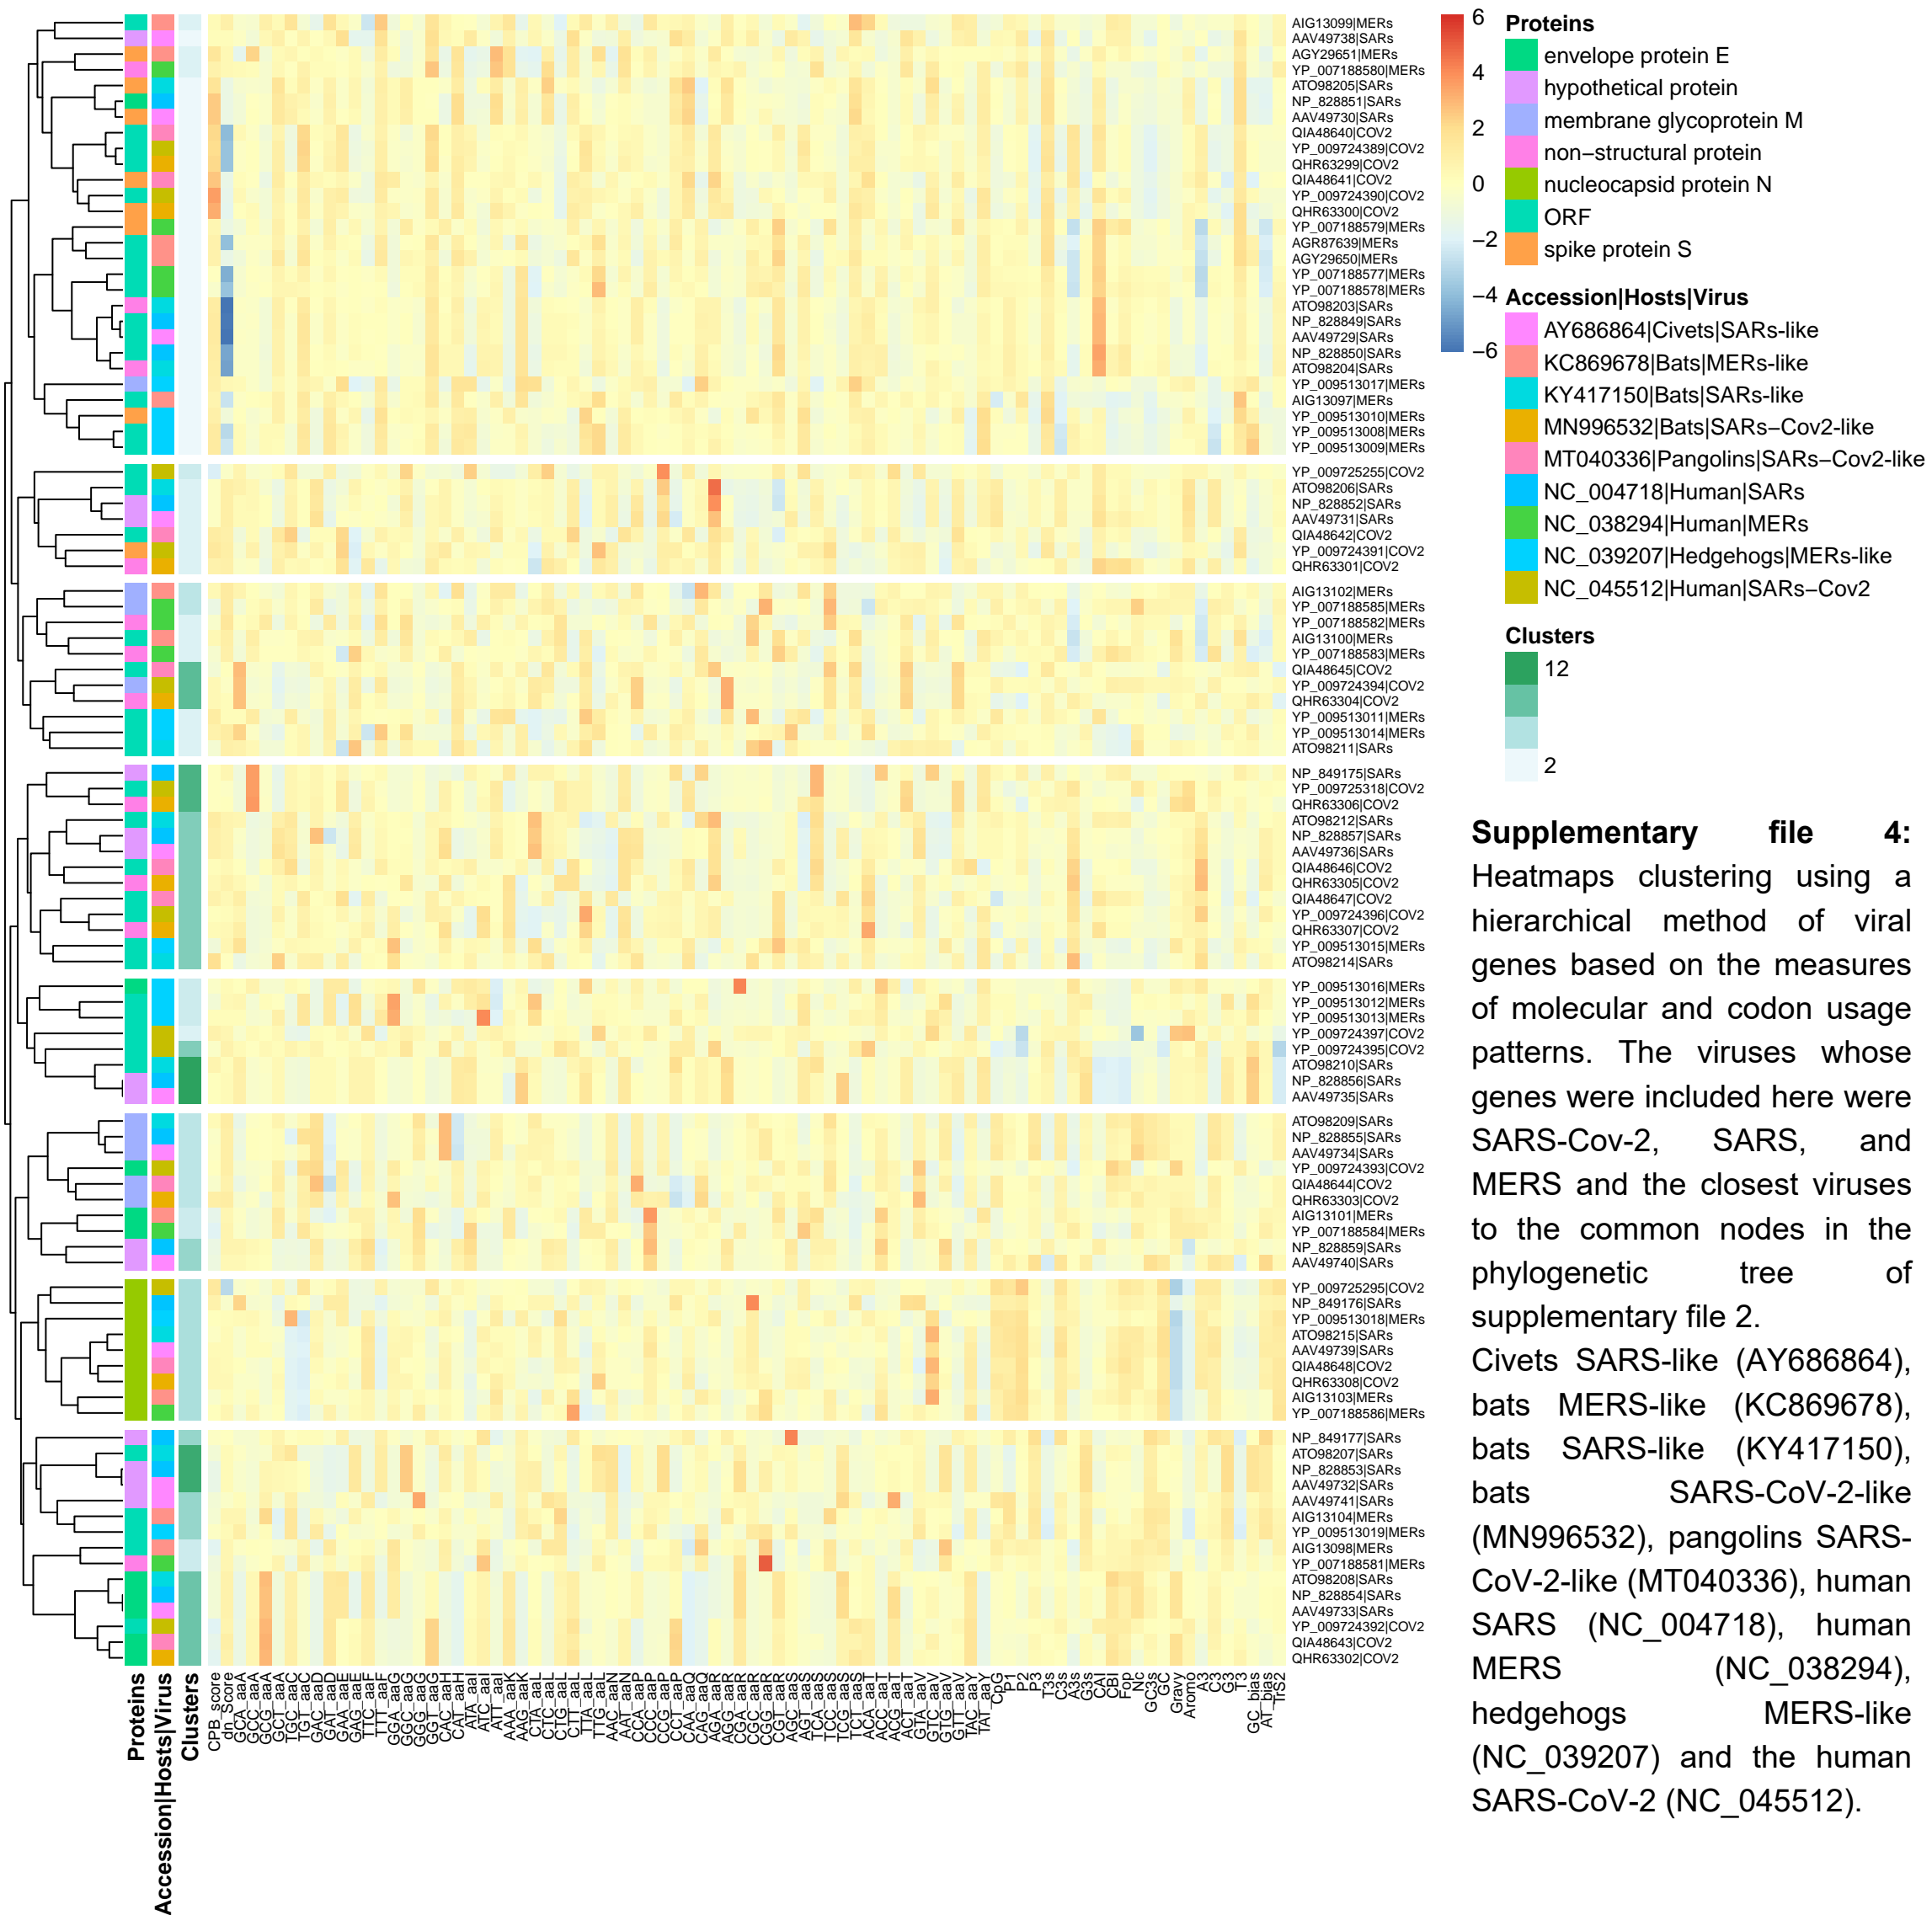

Supplement: 41598_2021_83595_MOESM4_ESM.pdf [file 41598_2021_83595_MOESM4_ESM.pdf]
